# Supplementary material for: Electrochemical fabrication of carbon nanotube/polyaniline hydrogel film for all-solid-state flexible supercapacitor with high areal capacitance
Source: Royal Society of Chemistry journal article supplement (doi:10.1039/c5ta05937b), 2015-01-01
Supplement: c5ta05937b1.pdf [file c5ta05937b1.pdf]

## Supporting Information

### Electrochemical fabrication of carbon nanotube/polyaniline hydrogel film for all-solid-state flexible supercapacitor with high areal capacitance

Sha Zeng<sup>a,b</sup>, Hongyuan Chen,<sup>a</sup> Feng Cai,<sup>a</sup> Yirang Kang,<sup>a</sup> Minghai Chen,<sup>\*a</sup> Qingwen Li,<sup>\*a</sup>

<sup>a</sup>Division of Advanced Nanomaterials and Key Lab of Nanodevices and Applications, Suzhou Institute of Nano-Tech and Nano-Bionics, Chinese Academy of Sciences, Suzhou 215123, PR China

<sup>b</sup>University of Chinese Academy of Sciences, Beijing 100049, PR China

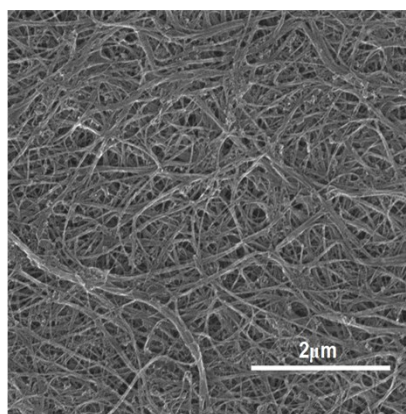

Figure S1 SEM of pristine CNTs film fabricated by FCCVD method

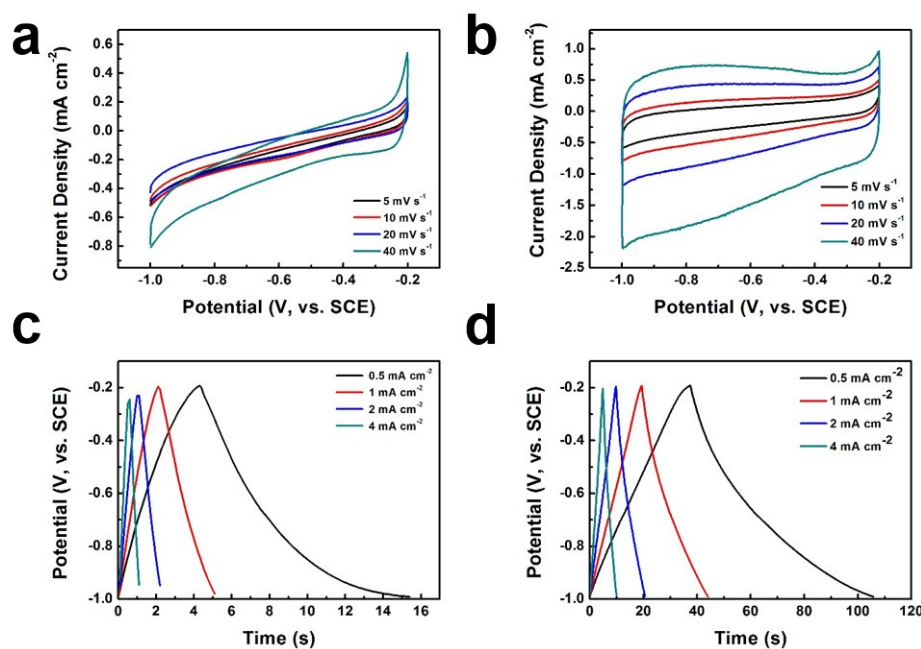

Figure S2 (a) CV curves of CNT film; (b) CV curves of CNT hydrogel film; (c) charge-discharge curves of CNT film; (d) charge-discharge curves of CNT hydrogel film

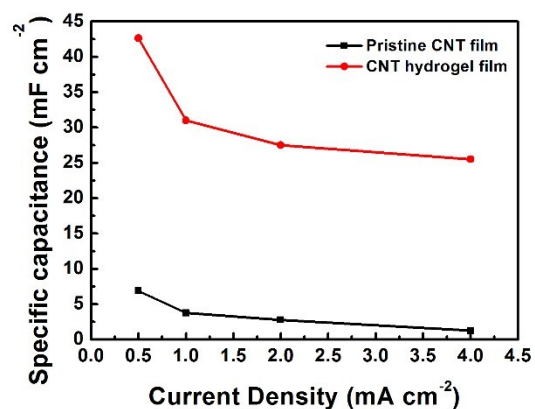

**Figure S3** Rate performance of pristine CNT film and CNT hydrogel film

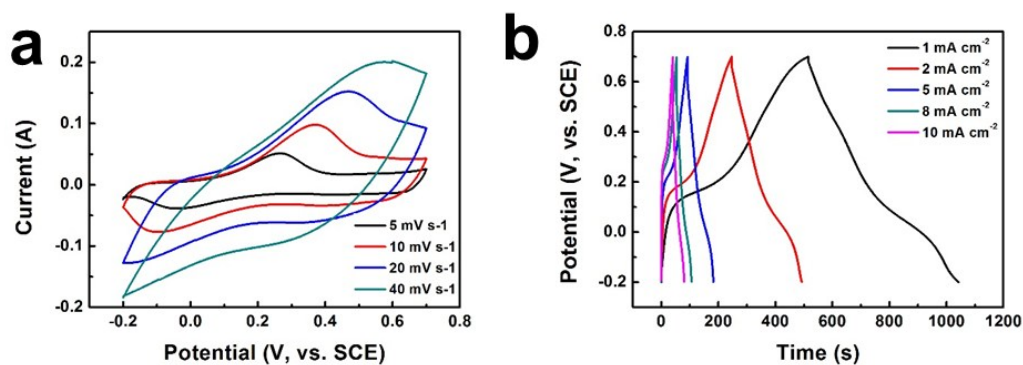

**Figure S4** (a) CV curves of CNT/PANI film; (b) Charge-discharge curves of CNT/PANI film

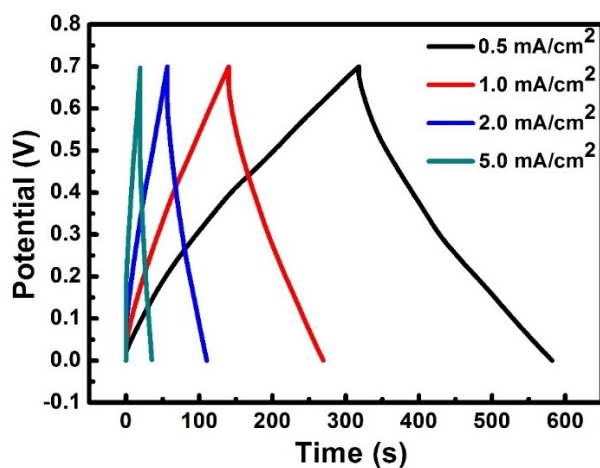

**Figure S5** Charge-discharge curves of all-solid-state flexible supercapacitor based on CNT/PANI hydrogel film
